# Supplementary material
Source: PubMed Central journal article supplement (PMC3738244)
Supplement: jn.112.169896_nutrition169896SupplementaryData1.pdf [file jn.112.169896_nutrition169896SupplementaryData1.pdf]

## Supplemental methods

### *Secondary analyses: relation between A-MeDi score components and cognitive function*

To determine whether the association between A-MeDi score and cognitive function was due to a specific food group, we additionally evaluated A-MeDi components separately. For these analyses, we used either quintiles of intake or sensible categories (nut intake: never or < once/mo, 1-3 times/mo; once/w, 2-4 times/w,  $\geq 5$  times/w; alcohol intake: none, 1 to 14.9 g/d,  $\geq 15$  g/d). We built two models: (i) one with all A-MeDi food components together (i.e., fruits, vegetables, legumes, whole grains, nuts, red and processed meats, fish, alcohol); (ii) one with the MUFA:SFA ratio and A-MeDi food components not providing fats (e.g., fruits, vegetables, legumes, whole grains). Both models included covariates from model 2.

**Supplemental Table 1:** Mean cognitive scores at each cognitive assessment <sup>1</sup> in the Nurses' Health Study Cognitive Sub-cohort

|                                                      | Assessment 1 | Assessment 2 | Assessment 3 | Assessment 4 |
|------------------------------------------------------|--------------|--------------|--------------|--------------|
| N <sup>2</sup>                                       | 16,058       | 14,524       | 12,609       | 10,136       |
| TICS                                                 | 33.8 ± 2.7   | 33.9 ± 2.9   | 33.6 ± 3.2   | 33.3 ± 3.6   |
| immediate recall of the TICS 10-word list            | 4.6 ± 1.7    | 4.9 ± 1.8    | 4.8 ± 1.8    | 4.7 ± 1.9    |
| delayed recall of the TICS 10-word list              | 2.3 ± 2.0    | 2.7 ± 2.2    | 2.6 ± 2.1    | 2.5 ± 2.1    |
| Immediate recall of the East Boston Memory Test      | 9.4 ± 1.7    | 9.5 ± 1.8    | 9.2 ± 1.9    | 9.3 ± 1.9    |
| Delayed recall of the East Boston Memory Test        | 9.0 ± 2.0    | 9.1 ± 2.1    | 8.8 ± 2.4    | 8.8 ± 2.6    |
| Category fluency                                     | 17.0 ± 4.6   | 17.1 ± 4.8   | 16.9 ± 5.0   | 16.3 ± 5.2   |
| Digit Span-Backwards test                            | 6.7 ± 2.4    | 6.7 ± 2.4    | 6.6 ± 2.3    | 6.3 ± 2.3    |
| Global cognitive score <sup>3</sup> , standard units | -0.01 ± 0.61 | 0.06 ± 0.65  | -0.03 ± 0.71 | -0.08 ± 0.77 |
| Verbal memory score <sup>4</sup> , standard units    | -0.01 ± 0.69 | 0.12 ± 0.75  | 0.01 ± 0.82  | 0.00 ± 0.85  |

Values are mean ± SD. Abbreviations: TICS: Telephone-Interview Cognitive Status.

<sup>1</sup> Assessment 1 was performed between 1995 and 2001, and follow-up assessments were performed at 2-year intervals. Follow-up remained at approximately 90% of those still alive.

<sup>2</sup> Sample sizes presented correspond to individuals who completed the TICS, and slightly vary across cognitive tests.

<sup>3</sup> Computed as the mean of z-scores of (i) the TICS; (ii) immediate and (iii) delayed recalls of the East Boston Memory test; (iv) delayed recall of the TICS 10-word list; (v) category fluency and (vi) digit span-backwards.

<sup>4</sup> Computed as the mean of z-scores of (i) immediate and (ii) delayed recalls of the East Boston Memory test; (iii) immediate and (iv) delayed recall of the TICS 10-word list.

**Supplemental Table 2.** Multivariable-Adjusted Mean Differences in Slopes of Cognitive Change by Categories of Long-term intake of Alternate Mediterranean Diet Score Components

|                           | Global score (N=14,337) | Verbal memory score (N=14,341) |
|---------------------------|-------------------------|--------------------------------|
| Vegetables <sup>1</sup>   |                         |                                |
| Quintile 1                | Ref                     | Ref                            |
| Quintile 2                | 0.008 (0.000, 0.016)    | 0.007 (-0.002, 0.017)          |
| Quintile 3                | 0.002 (-0.007, 0.010)   | -0.000 (-0.010, 0.010)         |
| Quintile 4                | 0.006 (-0.002, 0.015)   | 0.006 (-0.005, 0.016)          |
| Quintile 5                | 0.011 (0.001, 0.020)    | 0.009 (-0.002, 0.021)          |
| <i>P-trend</i>            | <i>0.04</i>             | <i>0.09</i>                    |
| Legumes <sup>1</sup>      |                         |                                |
| Quintile 1                | Ref                     | Ref                            |
| Quintile 2                | -0.001 (-0.008, 0.007)  | -0.003 (-0.012, 0.007)         |
| Quintile 3                | -0.002 (-0.010, 0.006)  | -0.004 (-0.013, 0.006)         |
| Quintile 4                | -0.000 (-0.008, 0.008)  | -0.002 (-0.012, 0.008)         |
| Quintile 5                | -0.003 (-0.012, 0.006)  | -0.008 (-0.018, 0.003)         |
| <i>P-trend</i>            | <i>0.38</i>             | <i>0.12</i>                    |
| Fruits <sup>1</sup>       |                         |                                |
| Quintile 1                | Ref                     | Ref                            |
| Quintile 2                | -0.006 (-0.014, 0.002)  | -0.002 (-0.012, 0.007)         |
| Quintile 3                | -0.003 (-0.011, 0.005)  | -0.001 (-0.011, 0.009)         |
| Quintile 4                | -0.008 (-0.017, 0.000)  | -0.003 (-0.014, 0.007)         |
| Quintile 5                | -0.008 (-0.018, 0.001)  | 0.000 (-0.011, 0.012)          |
| <i>P-trend</i>            | <i>0.17</i>             | <i>0.91</i>                    |
| Whole grains <sup>1</sup> |                         |                                |
| Quintile 1                | Ref                     | Ref                            |
| Quintile 2                | 0.001 (-0.007, 0.009)   | 0.002 (-0.008, 0.011)          |
| Quintile 3                | 0.002 (-0.006, 0.011)   | 0.003 (-0.007, 0.013)          |
| Quintile 4                | -0.004 (-0.013, 0.004)  | -0.003 (-0.013, 0.007)         |
| Quintile 5                | -0.000 (-0.009, 0.008)  | 0.000 (-0.010, 0.011)          |
| <i>P-trend</i>            | <i>0.59</i>             | <i>0.74</i>                    |
| Nuts <sup>1</sup>         |                         |                                |
| never or < once/mo        | Ref                     | Ref                            |
| 1-3 times/mo              | -0.002 (-0.010, 0.006)  | -0.002 (-0.012, 0.007)         |
| once/w                    | -0.001 (-0.008, 0.006)  | -0.000 (-0.008, 0.008)         |
| 2-4 times/w               | -0.001 (-0.010, 0.008)  | -0.001 (-0.011, 0.010)         |
| ≥5 times/w                | -0.003 (-0.015, 0.009)  | -0.004 (-0.019, 0.011)         |
| <i>P-trend</i>            | <i>0.93</i>             | <i>0.98</i>                    |
| Fish <sup>1</sup>         |                         |                                |
| Quintile 1                | Ref                     | Ref                            |
| Quintile 2                | -0.003 (-0.010, 0.005)  | -0.001 (-0.010, 0.009)         |
| Quintile 3                | 0.001 (-0.007, 0.009)   | 0.003 (-0.007, 0.012)          |
| Quintile 4                | 0.001 (-0.008, 0.009)   | 0.004 (-0.006, 0.014)          |
| Quintile 5                | 0.001 (-0.007, 0.010)   | 0.002 (-0.008, 0.013)          |
| <i>P-trend</i>            | <i>0.88</i>             | <i>0.93</i>                    |

**Supplemental Table 2 (continued).**

|                                      | Global score (N=14,337) | Verbal memory score (N=14,341) |
|--------------------------------------|-------------------------|--------------------------------|
| Red and processed meats <sup>1</sup> |                         |                                |
| Quintile 1                           | Ref                     | Ref                            |
| Quintile 2                           | -0.003 (-0.011, 0.005)  | -0.000 (-0.010, 0.009)         |
| Quintile 3                           | -0.000 (-0.008, 0.008)  | 0.001 (-0.009, 0.011)          |
| Quintile 4                           | 0.006 (-0.002, 0.015)   | 0.009 (-0.001, 0.020)          |
| Quintile 5                           | 0.002 (-0.007, 0.011)   | 0.006 (-0.005, 0.018)          |
| <i>P-trend</i>                       | <i>0.55</i>             | <i>0.30</i>                    |
| MUFA:SFA ratio <sup>2</sup>          |                         |                                |
| Quintile 1                           | Ref                     | Ref                            |
| Quintile 2                           | 0.003 (-0.005, 0.011)   | 0.001 (-0.008, 0.011)          |
| Quintile 3                           | 0.007 (-0.001, 0.015)   | 0.005 (-0.004, 0.014)          |
| Quintile 4                           | 0.011 (0.003, 0.018)    | 0.010 (0.000, 0.019)           |
| Quintile 5                           | 0.013 (0.005, 0.021)    | 0.014 (0.004, 0.024)           |
| <i>P-trend</i>                       | <i>&lt;0.001</i>        | <i>0.001</i>                   |
| Alcohol <sup>1</sup>                 |                         |                                |
| None                                 | Ref                     | Ref                            |
| 1 to 14.9 g/d                        | -0.002 (-0.007, 0.004)  | -0.003 (-0.009, 0.004)         |
| ≥15 g/d                              | -0.005 (-0.014, 0.004)  | -0.004 (-0.014, 0.007)         |
| <i>P-trend</i>                       | <i>0.29</i>             | <i>0.51</i>                    |

Values are mean differences (95% CI) expressed in standard units/y.

Abbreviations: TICS: Telephone-Interview Cognitive Status; MUFA: monounsaturated fats; SFA: saturated fats.

<sup>1</sup> Models included all Alternate Mediterranean Diet Score food components together (e.g., vegetables, legumes, fruits, whole grains, nuts, fish, red and processed meats), alcohol intake and the following covariates: age, education, long-term physical activity and energy intake, body mass index, smoking, history of depression, multivitamin use, and histories of diabetes, hypertension, hypercholesterolemia and myocardial infarction.

<sup>2</sup> Models included the MUFA:SFA ratio, Alternate Mediterranean Diet Score food components not providing fats (e.g., vegetables, legumes, fruits, whole grains), alcohol intake and the same covariates as in 1.

**Supplemental Table 3.** Multivariable-Adjusted Mean Differences in Overall Cognitive Status at Older Ages by Categories of Long-term intake of Alternate Mediterranean Diet Score Components (N=16,058)

|                           | Global score         | Verbal memory score  |
|---------------------------|----------------------|----------------------|
| Vegetables <sup>1</sup>   |                      |                      |
| Quintile 1                | Ref                  | Ref                  |
| Quintile 2                | 0.04 (0.01, 0.07)    | 0.05 (0.02, 0.08)    |
| Quintile 3                | 0.03 (0.00, 0.06)    | 0.03 (0.00, 0.07)    |
| Quintile 4                | 0.05 (0.01, 0.08)    | 0.06 (0.02, 0.09)    |
| Quintile 5                | 0.05 (0.01, 0.08)    | 0.06 (0.02, 0.10)    |
| <i>P-trend</i>            | 0.03                 | 0.003                |
| Legumes <sup>1</sup>      |                      |                      |
| Quintile 1                | Ref                  | Ref                  |
| Quintile 2                | 0.04 (0.01, 0.07)    | 0.05 (0.01, 0.08)    |
| Quintile 3                | 0.02 (-0.01, 0.05)   | 0.01 (-0.02, 0.04)   |
| Quintile 4                | 0.03 (0.00, 0.06)    | 0.03 (-0.01, 0.06)   |
| Quintile 5                | 0.03 (-0.00, 0.06)   | 0.04 (0.00, 0.07)    |
| <i>P-trend</i>            | 0.23                 | 0.12                 |
| Fruits <sup>1</sup>       |                      |                      |
| Quintile 1                | Ref                  | Ref                  |
| Quintile 2                | -0.02 (-0.05, 0.01)  | -0.03 (-0.06, 0.01)  |
| Quintile 3                | -0.02 (-0.05, 0.01)  | -0.03 (-0.06, 0.00)  |
| Quintile 4                | -0.05 (-0.09, -0.02) | -0.06 (-0.10, -0.03) |
| Quintile 5                | -0.06 (-0.09, -0.02) | -0.05 (-0.09, -0.01) |
| <i>P-trend</i>            | <0.001               | 0.009                |
| Whole grains <sup>1</sup> |                      |                      |
| Quintile 1                | Ref                  | Ref                  |
| Quintile 2                | 0.02 (-0.01, 0.05)   | 0.02 (-0.01, 0.05)   |
| Quintile 3                | 0.04 (0.01, 0.07)    | 0.02 (-0.01, 0.05)   |
| Quintile 4                | 0.00 (-0.03, 0.03)   | -0.02 (-0.05, 0.01)  |
| Quintile 5                | 0.03 (-0.00, 0.06)   | 0.01 (-0.03, 0.04)   |
| <i>P-trend</i>            | 0.47                 | 0.38                 |
| Nuts <sup>1</sup>         |                      |                      |
| never or < once/mo        | Ref                  | Ref                  |
| 1-3 times/mo              | 0.01 (-0.02, 0.04)   | 0.01 (-0.03, 0.04)   |
| once/w                    | 0.02 (-0.00, 0.05)   | 0.02 (-0.01, 0.04)   |
| 2-4 times/w               | 0.03 (-0.00, 0.07)   | 0.04 (-0.00, 0.07)   |
| ≥5 times/w                | 0.02 (-0.03, 0.06)   | 0.01 (-0.04, 0.06)   |
| <i>P-trend</i>            | 0.02                 | 0.05                 |
| Fish <sup>1</sup>         |                      |                      |
| Quintile 1                | Ref                  | Ref                  |
| Quintile 2                | -0.01 (-0.03, 0.02)  | 0.01 (-0.02, 0.04)   |
| Quintile 3                | -0.00 (-0.03, 0.03)  | 0.02 (-0.01, 0.05)   |
| Quintile 4                | -0.02 (-0.05, 0.01)  | 0.01 (-0.03, 0.04)   |
| Quintile 5                | 0.00 (-0.03, 0.04)   | 0.04 (0.01, 0.08)    |
| <i>P-trend</i>            | 0.26                 | 0.003                |

**Supplemental Table 3 (continued).**

|                                      | Global score         | Verbal memory score  |
|--------------------------------------|----------------------|----------------------|
| Red and processed meats <sup>1</sup> |                      |                      |
| Quintile 1                           | Ref                  | Ref                  |
| Quintile 2                           | -0.04 (-0.06, -0.01) | -0.03 (-0.06, 0.00)  |
| Quintile 3                           | -0.03 (-0.06, -0.00) | -0.03 (-0.06, 0.01)  |
| Quintile 4                           | -0.03 (-0.06, 0.00)  | -0.03 (-0.06, 0.01)  |
| Quintile 5                           | -0.04 (-0.08, -0.01) | -0.05 (-0.08, -0.01) |
| <i>P-trend</i>                       | <i>0.17</i>          | <i>0.16</i>          |
| MUFA:SFA ratio <sup>2</sup>          |                      |                      |
| Quintile 1                           | Ref                  | Ref                  |
| Quintile 2                           | 0.01 (-0.01, 0.04)   | 0.02 (-0.02, 0.05)   |
| Quintile 3                           | 0.02 (-0.01, 0.05)   | 0.02 (-0.01, 0.05)   |
| Quintile 4                           | 0.01 (-0.02, 0.04)   | 0.00 (-0.03, 0.04)   |
| Quintile 5                           | 0.01 (-0.02, 0.04)   | 0.01 (-0.02, 0.05)   |
| <i>P-trend</i>                       | <i>0.72</i>          | <i>0.57</i>          |
| Alcohol <sup>1</sup>                 |                      |                      |
| None                                 | Ref                  | Ref                  |
| 1 to 14.9 g/d                        | 0.02 (-0.01, 0.04)   | 0.01 (-0.01, 0.03)   |
| ≥15 g/d                              | 0.02 (-0.01, 0.05)   | 0.02 (-0.02, 0.06)   |
| <i>P-trend</i>                       | <i>0.42</i>          | <i>0.49</i>          |

Values are mean differences (95% CI) expressed in standard units.

Abbreviations: TICS: Telephone-Interview Cognitive Status; MUFA: monounsaturated fats; SFA: saturated fats.

<sup>1</sup> Models included all Alternate Mediterranean Diet Score food components together (e.g., vegetables, legumes, fruits, whole grains, nuts, fish, red and processed meats), alcohol intake and the following covariates: age, education, long-term physical activity and energy intake, body mass index, smoking, history of depression, multivitamin use, and histories of diabetes, hypertension, hypercholesterolemia and myocardial infarction.

<sup>2</sup> Models included the MUFA:SFA ratio, Alternate Mediterranean Diet Score food components not providing fats (e.g., vegetables, legumes, fruits, whole grains), alcohol intake and the same covariates as in 1.
